# Supplementary material for: B-Myb accelerates colorectal cancer progression through reciprocal feed-forward transactivation of E2F2
Source: PubMed Central journal article supplement (PMC8445821; doi:10.1038/s41388-021-01961-9), 2021-07-27
Supplement: 41388_2021_1961_MOESM2_ESM.pdf [file 41388_2021_1961_MOESM2_ESM.pdf]

## Supplementary Tables

Supplementary Table S1. The clinical pathological information of Colorectal Cancer cDNA Array.

| #  | NO. | Gender | Stage |
|----|-----|--------|-------|
| 1  | C1  | Male   | 0     |
| 2  | C1  | Male   | 0     |
| 3  | C2  | Male   | 0     |
| 4  | C3  | Male   | 0     |
| 5  | C4  | Female | 0     |
| 6  | C5  | Female | 0     |
| 7  | C6  | Male   | I     |
| 8  | C7  | Female | I     |
| 9  | C8  | Female | I     |
| 10 | C9  | Female | I     |
| 11 | C10 | Female | I     |
| 12 | C11 | Female | I     |
| 13 | C12 | Male   | II    |
| 14 | D1  | Male   | IIA   |
| 15 | D2  | Female | IIA   |
| 16 | D3  | Female | IIA   |
| 17 | D4  | Female | IIA   |
| 18 | D5  | Male   | IIA   |
| 19 | D6  | Female | IIA   |
| 20 | D7  | Female | IIA   |
| 21 | D8  | Male   | IIA   |
| 22 | D9  | Male   | IIA   |
| 23 | D10 | Male   | IIA   |
| 24 | D11 | Male   | IIA   |
| 25 | D12 | Male   | IIA   |
| 26 | E1  | Male   | IIA   |
| 27 | E2  | Male   | IIA   |
| 28 | E3  | Female | IIB   |
| 29 | E4  | Male   | IIB   |
| 30 | E5  | Male   | IIB   |
| 31 | E6  | Male   | III   |
| 32 | E7  | Male   | III   |
| 33 | E8  | Female | III   |
| 34 | E9  | Female | III   |
| 35 | E10 | Female | III   |
| 36 | E11 | Female | IIIA  |
| 37 | E12 | Female | IIIA  |
| 38 | F1  | Male   | IIIA  |
| 39 | F2  | Female | IIB   |
| 40 | F3  | Male   | IIB   |

---

|    |     |        |      |
|----|-----|--------|------|
| 41 | F4  | Female | IIIB |
| 42 | F5  | Male   | IIIC |
| 43 | F6  | Male   | IIIC |
| 44 | F7  | Male   | IIIC |
| 45 | F8  | Male   | IV   |
| 46 | F9  | Male   | IV   |
| 47 | F10 | Female | IV   |
| 48 | F11 | Female | IV   |
| 49 | F12 | Female | IV   |

---

**Supplementary Table S2. Immunohistochemistry analysis of B-Myb expression in colorectal cancer.**

| Pathological variables   | Sample no. | B-Myb IHC staining (%) |           | P value       |
|--------------------------|------------|------------------------|-----------|---------------|
|                          |            | Negative               | Positive  |               |
| Normal tissues           | 10         | 5 (50.0)               | 5 (0)     | <b>0.045*</b> |
| Primary tumors           | 109        | 21 (19.3)              | 84 (80.7) |               |
| <b>Stage</b>             |            |                        |           | <b>0.631</b>  |
| I + II                   | 71         | 14 (19.7)              | 57 (80.3) |               |
| III+IV                   | 38         | 9 (23.7)               | 29 (76.3) |               |
| <b>Lymph node status</b> |            |                        |           | <b>0.604</b>  |
| pN0                      | 72         | 12 (16.7)              | 60 (83.3) |               |
| pN1+                     | 37         | 8 (21.6)               | 29 (78.4) |               |
| <b>Grade</b>             |            |                        |           | <b>0.032*</b> |
| 1                        | 32         | 3 (9.3)                | 29 (90.7) |               |
| 2                        | 40         | 7 (17.5)               | 33 (83.5) |               |
| 3                        | 21         | 8 (38.1)               | 13 (61.9) |               |
| <b>Missing</b>           | <b>15</b>  |                        |           |               |
| <b>Tumour size</b>       |            |                        |           | <b>0.701</b>  |
| T1-3                     | 56         | 10 (17.9)              | 46 (82.1) |               |
| T4                       | 53         | 11 (20.8)              | 42 (79.2) |               |

\*P < 0.05 (Chi-square tests)

**Supplementary Table S3. The clinical information of colorectal cancer tissue microarray.**

| #  | position | sex | Age | Tissue | Pathological Diagnosis  | Grade | Stage | TNM    |
|----|----------|-----|-----|--------|-------------------------|-------|-------|--------|
| 1  | 1 A      | F   | 40  | Colon  | Adenocarcinoma          | 1     | IIB   | T4N0M0 |
| 2  | 1 B      | M   | 67  | Colon  | Mucinous adenocarcinoma | 1     | IIA   | T3N0M0 |
| 3  | 1 C      | M   | 73  | Colon  | Adenocarcinoma          | 1     | IIA   | T3N0M0 |
| 4  | 1 D      | F   | 50  | Colon  | Adenocarcinoma          | 1     | IIIC  | T4N2M0 |
| 5  | 1 E      | F   | 51  | Colon  | Adenocarcinoma          | 2     | IIB   | T4N0M0 |
| 6  | 1 F      | M   | 36  | Colon  | Adenocarcinoma          | 1     | IIB   | T4N0M0 |
| 7  | 1 G      | M   | 70  | Colon  | Adenocarcinoma          | 1     | I     | T2N0M0 |
| 8  | 1 H      | M   | 54  | Colon  | Adenocarcinoma          | 1     | IIIC  | T4N2M0 |
| 9  | 1 I      | M   | 31  | Colon  | Adenocarcinoma          | 1     | IIB   | T4N0M0 |
| 10 | 1 J      | M   | 72  | Colon  | Adenocarcinoma          | 1     | IIIB  | T3N1M0 |
| 11 | 1 K      | F   | 60  | Colon  | Adenocarcinoma          | –     | IIA   | T3N0M0 |
| 12 | 1 L      | F   | 55  | Colon  | Adenocarcinoma          | 1     | IIA   | T3N0M0 |
| 13 | 2 A      | M   | 74  | Colon  | Adenocarcinoma          | 1     | IIA   | T3N0M0 |
| 14 | 2 B      | M   | 63  | Colon  | Adenocarcinoma          | 1     | IIA   | T3N0M0 |
| 15 | 2 C      | F   | 33  | Colon  | Adenocarcinoma          | 1     | IIIC  | T3N2M0 |
| 16 | 2 D      | M   | 51  | Colon  | Adenocarcinoma          | 1     | I     | T2N0M0 |
| 17 | 2 E      | F   | 49  | Colon  | Adenocarcinoma          | 1     | IIIB  | T4N1M0 |
| 18 | 2 F      | M   | 77  | Colon  | Adenocarcinoma          | 1     | IIB   | T4N0M0 |
| 19 | 2 G      | M   | 45  | Colon  | Mucinous adenocarcinoma | 1     | IIB   | T4N0M0 |
| 0  | 2 H      | M   | 79  | Colon  | Adenocarcinoma          | 1     | IIB   | T4N0M0 |
| 21 | 2 I      | M   | 83  | Colon  | Adenocarcinoma          | 1     | IIIB  | T4N1M0 |
| 22 | 2 J      | F   | 67  | Colon  | Adenocarcinoma          | –     | IIIB  | T3N1M0 |
| 23 | 2 K      | F   | 68  | Colon  | Mucinous adenocarcinoma | 1     | IIA   | T3N0M0 |
| 24 | 2 L      | M   | 64  | Colon  | Adenocarcinoma          | 1     | IIA   | T3N0M0 |
| 25 | 3 A      | F   | 59  | Colon  | Mucinous adenocarcinoma | 2     | IIIB  | T3N1M0 |
| 26 | 3 B      | M   | 34  | Colon  | Mucinous adenocarcinoma | 3     | IIA   | T3N0M0 |
| 27 | 3 C      | M   | 58  | Colon  | Mucinous adenocarcinoma | 1     | IV    | T4N1M1 |
| 28 | 3 D      | M   | 57  | Colon  | Mucinous adenocarcinoma | 2     | IIIC  | T3N2M0 |
| 29 | 3 E      | F   | 65  | Colon  | Adenocarcinoma          | 1     | IIB   | T4N0M0 |
| 30 | 3 F      | F   | 43  | Colon  | Adenocarcinoma          | 1     | IIIB  | T3N1M0 |
| 31 | 3 G      | M   | 73  | Colon  | Adenocarcinoma          | –     | IIIC  | T4N2M0 |
| 32 | 3 H      | M   | 58  | Colon  | Adenocarcinoma          | 2     | IIB   | T4N0M0 |
| 33 | 3 I      | F   | 82  | Colon  | Adenocarcinoma          | 2     | IIB   | T4N0M0 |
| 34 | 3 J      | M   | 66  | Colon  | Mucinous adenocarcinoma | 1     | IIB   | T4N0M0 |
| 35 | 3 K      | F   | 52  | Colon  | Adenocarcinoma          | 2     | IIA   | T3N0M0 |
| 36 | 3 L      | M   | 45  | Colon  | Adenocarcinoma          | 2     | IIB   | T4N0M0 |
| 37 | 4 A      | F   | 71  | Colon  | Adenocarcinoma          | 1     | IIB   | T4N0M0 |
| 38 | 4 B      | M   | 70  | Colon  | Adenocarcinoma          | 2     | IIA   | T3N0M0 |
| 39 | 4 C      | M   | 77  | Colon  | Adenocarcinoma          | 2     | IIB   | T4N0M0 |
| 40 | 4 D      | F   | 51  | Colon  | Adenocarcinoma          | –     | IIB   | T4N0M0 |
| 41 | 4 E      | M   | 63  | Colon  | Adenocarcinoma          | 2     | IIB   | T4N0M0 |

|    |     |   |    |       |                         |   |      |        |
|----|-----|---|----|-------|-------------------------|---|------|--------|
| 42 | 4 F | F | 38 | Colon | Adenocarcinoma          | 2 | IIB  | T4N0M0 |
| 43 | 4 G | F | 58 | Colon | Adenocarcinoma          | 2 | IIB  | T4N0M0 |
| 44 | 4 H | F | 48 | Colon | Adenocarcinoma          | 2 | IIA  | T3N0M0 |
| 45 | 4 I | M | 63 | Colon | Adenocarcinoma          | 2 | IIA  | T3N0M0 |
| 46 | 4 J | M | 70 | Colon | Adenocarcinoma          | – | IIIB | T4N1M0 |
| 47 | 4 K | M | 74 | Colon | Adenocarcinoma          | 2 | IIA  | T3N0M0 |
| 48 | 4 L | M | 39 | Colon | Adenocarcinoma          | 2 | IIIB | T4N1M0 |
| 49 | 5 A | F | 41 | Colon | Adenocarcinoma          | 1 | IIA  | T3N0M0 |
| 50 | 5 B | M | 38 | Colon | Adenocarcinoma          | 1 | IIIB | T4N1M0 |
| 51 | 5 C | F | 51 | Colon | Adenocarcinoma          | 1 | IIA  | T3N0M0 |
| 52 | 5 D | M | 67 | Colon | Adenocarcinoma          | 1 | IIA  | T3N0M0 |
| 53 | 5 E | F | 42 | Colon | Adenocarcinoma          | 1 | IIB  | T4N0M0 |
| 54 | 5 F | M | 51 | Colon | Adenocarcinoma          | 3 | IIA  | T3N0M0 |
| 55 | 5 G | M | 31 | Colon | Adenocarcinoma          | 3 | IIB  | T4N0M0 |
| 56 | 5 H | F | 68 | Colon | Adenocarcinoma          | 2 | IIA  | T3N0M0 |
| 57 | 5 I | M | 61 | Colon | Adenocarcinoma          | – | IIB  | T4N0M0 |
| 58 | 5 J | M | 72 | Colon | Adenocarcinoma          | 2 | IIA  | T3N0M0 |
| 59 | 5 K | M | 67 | Colon | Adenocarcinoma          | 2 | IIIC | T4N2M0 |
| 60 | 5 L | M | 66 | Colon | Adenocarcinoma          | 2 | IIA  | T3N0M0 |
| 61 | 6 A | F | 70 | Colon | Mucinous adenocarcinoma | 2 | II   | T3N0M0 |
| 62 | 6 B | M | 74 | Colon | Mucinous adenocarcinoma | 2 | IIA  | T3N0M0 |
| 63 | 6 C | F | 76 | Colon | Adenocarcinoma          | – | I    | T2N0M0 |
| 64 | 6 D | F | 52 | Colon | Adenocarcinoma          | – | IIB  | T4N0M0 |
| 65 | 6 E | F | 60 | Colon | Adenocarcinoma          | – | IIIB | T3N1M0 |
| 66 | 6 F | F | 47 | Colon | Mucinous adenocarcinoma | 3 | IV   | T4N1M1 |
| 67 | 6 G | M | 75 | Colon | Adenocarcinoma          | 2 | IIIB | T3N1M0 |
| 68 | 6 H | F | 77 | Colon | Adenocarcinoma          | 2 | IIA  | T3N0M0 |
| 69 | 6 I | F | 70 | Colon | Adenocarcinoma          | 2 | IIIC | T3N2M0 |
| 70 | 6 J | M | 33 | Colon | Adenocarcinoma          | 2 | IIIA | T2N1M0 |
| 71 | 6 K | M | 43 | Colon | Adenocarcinoma          | 2 | IIIB | T3N1M0 |
| 72 | 6 L | M | 52 | Colon | Adenocarcinoma          | 2 | IV   | T2N1M1 |
| 73 | 7 A | M | 39 | Colon | Adenocarcinoma          | 2 | IIIC | T4N2M0 |
| 74 | 7 B | M | 62 | Colon | Adenocarcinoma          | 1 | IIA  | T3N0M0 |
| 75 | 7 C | M | 77 | Colon | Adenocarcinoma          | 1 | IIA  | T3N0M0 |
| 76 | 7 D | M | 45 | Colon | Adenocarcinoma          | 1 | IIB  | T4N0M0 |
| 77 | 7 E | F | 52 | Colon | Adenocarcinoma          | – | IIA  | T3N0M0 |
| 78 | 7 F | F | 73 | Colon | Adenocarcinoma          | 2 | IIIC | T4N2M0 |
| 79 | 7 G | M | 75 | Colon | Adenocarcinoma          | 2 | IIA  | T3N0M0 |
| 80 | 7 H | M | 47 | Colon | Adenocarcinoma          | – | I    | T2N0M0 |
| 81 | 7 I | M | 48 | Colon | Adenocarcinoma          | 3 | IIA  | T3N0M0 |
| 82 | 7 J | M | 41 | Colon | Adenocarcinoma          | 3 | IIB  | T4N0M0 |
| 83 | 7 K | M | 34 | Colon | Adenocarcinoma          | 2 | IIB  | T4N0M0 |
| 84 | 7 L | M | 79 | Colon | Adenocarcinoma          | 2 | IIA  | T3N0M0 |
| 85 | 8 A | M | 73 | Colon | Adenocarcinoma          | 2 | IIIC | T4N2M0 |
| 86 | 8 B | M | 60 | Colon | Adenocarcinoma          | 2 | IIA  | T3N0M0 |

|     |      |   |    |       |                         |   |      |        |
|-----|------|---|----|-------|-------------------------|---|------|--------|
| 87  | 8 C  | M | 47 | Colon | Adenocarcinoma          | – | IIB  | T4N0M0 |
| 88  | 8 D  | M | 52 | Colon | Adenocarcinoma          | 2 | IIIB | T3N1M0 |
| 89  | 8 E  | M | 63 | Colon | Adenocarcinoma          | 3 | IV   | T4N0M1 |
| 90  | 8 F  | M | 41 | Colon | Adenocarcinoma          | 2 | IIIB | T4N1M0 |
| 91  | 8 G  | M | 52 | Colon | Adenocarcinoma          | 2 | II   | T4N0M0 |
| 92  | 8 H  | M | 70 | Colon | Mucinous adenocarcinoma | 2 | IIB  | T4N0M0 |
| 93  | 8 I  | F | 24 | Colon | Adenocarcinoma          | 3 | IV   | T4N2M1 |
| 94  | 8 J  | M | 58 | Colon | Adenocarcinoma          | 3 | IIIB | T3N1M0 |
| 95  | 8 K  | M | 35 | Colon | Adenocarcinoma          | 3 | IIA  | T3N0M0 |
| 96  | 8 L  | M | 71 | Colon | Adenocarcinoma          | 3 | IIB  | T4N0M0 |
| 97  | 9 A  | M | 68 | Colon | Adenocarcinoma          | 3 | IV   | T4N0M1 |
| 98  | 9 B  | M | 56 | Colon | Mucinous adenocarcinoma | 3 | IV   | T3N1M1 |
| 99  | 9 C  | M | 27 | Colon | Mucinous adenocarcinoma | 3 | IIIC | T3N2M0 |
| 100 | 9 D  | M | 55 | Colon | Adenocarcinoma          | – | IIA  | T3N0M0 |
| 101 | 9 E  | M | 48 | Colon | Mucinous adenocarcinoma | 3 | IIA  | T3N0M0 |
| 102 | 9 F  | M | 68 | Colon | Adenocarcinoma          | 3 | III  | T3N1M0 |
| 103 | 9 G  | M | 37 | Colon | Adenocarcinoma          | 3 | IIB  | T4N0M0 |
| 104 | 9 H  | F | 71 | Colon | Adenocarcinoma          | 3 | IIIB | T4N1M0 |
| 105 | 9 I  | M | 63 | Colon | Adenocarcinoma          | 3 | IIA  | T3N0M0 |
| 106 | 9 J  | F | 49 | Colon | Mucinous adenocarcinoma | 3 | IIB  | T4N0M0 |
| 107 | 9 K  | M | 51 | Colon | Mucinous adenocarcinoma | 3 | IIIB | T4N1M0 |
| 108 | 9 L  | M | 68 | Colon | Adenocarcinoma          | 2 | IIIB | T4N1M0 |
| 109 | 10 A | M | 72 | Colon | Adenocarcinoma          | 3 | IIB  | T4N0M0 |
| 110 | 10 B | F | 34 | Colon | Adenocarcinoma          | – | IV   | T4N1M1 |
| 111 | 10 C | M | 31 | Colon | Normal colonic tissue   | – | –    | –      |
| 112 | 10 D | M | 28 | Colon | Normal colonic tissue   | – | –    | –      |
| 113 | 10 E | M | 32 | Colon | Normal colonic tissue   | – | –    | –      |
| 114 | 10 F | M | 34 | Colon | Normal colonic tissue   | – | –    | –      |
| 115 | 10 G | M | 32 | Colon | Normal colonic tissue   | – | –    | –      |
| 116 | 10 H | M | 37 | Colon | Normal colonic tissue   | – | –    | –      |
| 117 | 10 I | M | 32 | Colon | Normal colonic tissue   | – | –    | –      |
| 118 | 10 J | M | 41 | Colon | Normal colonic tissue   | – | –    | –      |
| 119 | 10 K | M | 32 | Colon | Normal colonic tissue   | – | –    | –      |
| 120 | 10 L | M | 34 | Colon | Normal colonic tissue   | – | –    | –      |
| 121 | 10 M | – | –  | –     | Array marker            | – | –    | –      |

**Supplementary Table S4. Antibodies used in the present study.**

| <b>Protein name</b>           | <b>Manufacture (cat. number)</b>  | <b>Applications (working dilution)</b> | <b>Website Link</b>                                                                                                                                                                                                                                                                                                                                 |
|-------------------------------|-----------------------------------|----------------------------------------|-----------------------------------------------------------------------------------------------------------------------------------------------------------------------------------------------------------------------------------------------------------------------------------------------------------------------------------------------------|
| GAPDH                         | Xianzhi Bio (AB-P-R 001)          | IB (1:5000)                            | <a href="http://www.goodhere.com/showproduct.asp?id=320&amp;classid=34&amp;nid=2">http://www.goodhere.com/showproduct.asp?id=320&amp;classid=34&amp;nid=2</a>                                                                                                                                                                                       |
| B-Myb                         | Santa Cruz (N-19):sc-724          | IB (1:500)                             | <a href="http://www.scbt.com/datasheet-724-b-myb-n-19-antibody.html">http://www.scbt.com/datasheet-724-b-myb-n-19-antibody.html</a>                                                                                                                                                                                                                 |
| B-Myb                         | Santa Cruz (H-115):sc-13028       | IHC (1:50)                             | <a href="http://www.scbt.com/datasheet-13028-b-myb-h-115-antibody.html">http://www.scbt.com/datasheet-13028-b-myb-h-115-antibody.html</a>                                                                                                                                                                                                           |
| E2F2                          | Santa Cruz (TFE-25):sc-9967       | IB (1:500)<br>IF (1:200)               | <a href="https://www.scbt.com/scbt/zh/product/e2f-2-antibody-tfe-25?requestFrom=search">https://www.scbt.com/scbt/zh/product/e2f-2-antibody-tfe-25?requestFrom=search</a>                                                                                                                                                                           |
| ERK                           | Cell Signaling Technology (4695S) | IB (1:2000)                            | <a href="http://www.cst-c.com.cn/products/4695.html">http://www.cst-c.com.cn/products/4695.html</a>                                                                                                                                                                                                                                                 |
| p-ERK                         | Cell Signaling Technology (4370S) | IB (1:2000)                            | <a href="http://www.cst-c.com.cn/products/4370.html">http://www.cst-c.com.cn/products/4370.html</a>                                                                                                                                                                                                                                                 |
| p-Akt                         | Ruiying Bio (RLP0006)             | IB (1:500)                             | <a href="http://rlgene.com/showproduct.asp?/1_439">http://rlgene.com/showproduct.asp?/1_439</a>                                                                                                                                                                                                                                                     |
| HA                            | Beyotime (AH158)                  | IF (1:300)                             | <a href="http://www.beyotime.com/product/AH158.htm">http://www.beyotime.com/product/AH158.htm</a>                                                                                                                                                                                                                                                   |
| BrdU                          | Sigma (B2531)                     | IF (1:500)                             | <a href="http://www.sigmaaldrich.com/catalog/product/sigma/b2531?lang=zh&amp;regio">http://www.sigmaaldrich.com/catalog/product/sigma/b2531?lang=zh&amp;regio</a>                                                                                                                                                                                   |
| pHH3                          | Cell Signaling Technology (9706)  | IF (1:200)                             | <a href="https://www.cellsignal.com/products/primary-antibodies/phospho-histone-h3-ser10-6g3-mouse-mab/9706?N=4294956287&amp;Ntt=Phospho+Histone+H3++ser10&amp;fromPage=plp">https://www.cellsignal.com/products/primary-antibodies/phospho-histone-h3-ser10-6g3-mouse-mab/9706?N=4294956287&amp;Ntt=Phospho+Histone+H3++ser10&amp;fromPage=plp</a> |
| IgG                           | Beyotime (A7016)                  | IP                                     | <a href="https://www.beyotime.com/product/A7016.htm">https://www.beyotime.com/product/A7016.htm</a>                                                                                                                                                                                                                                                 |
| Flag                          | Sigma (F1804-200UG)               | IP                                     | <a href="https://www.sigmaaldrich.com/catalog/product/sigma/f1804?lang=zh&amp;region=CN">https://www.sigmaaldrich.com/catalog/product/sigma/f1804?lang=zh&amp;region=CN</a>                                                                                                                                                                         |
| antiMouse secondary antibody  | Abgent (ASS1007)                  | IB (1:5000)                            | <a href="http://www.abgent.com/products/ASS1007-Goat-Anti-Mouse-IgGHL-Human-ads-HRP-Secondary-Antibody">http://www.abgent.com/products/ASS1007-Goat-Anti-Mouse-IgGHL-Human-ads-HRP-Secondary-Antibody</a>                                                                                                                                           |
| antiRabbit secondary antibody | Abgent (ASS1009)                  | IB (1:5000)                            | <a href="http://www.abgent.com/products/ASS1009-Goat-Anti-Rabbit-IgGHL-MouseHuman-ads-HRP-Secondary-Antibody">http://www.abgent.com/products/ASS1009-Goat-Anti-Rabbit-IgGHL-MouseHuman-ads-HRP-Secondary-Antibody</a>                                                                                                                               |
| antiMouse secondary antibody  | Thermo (A-11031)                  | IF (1:1000)                            | <a href="https://www.thermofisher.com/antibody/product/Goat-anti-Mouse-IgG-H-L-Secondary-Antibody-Polyclonal/A-11031">https://www.thermofisher.com/antibody/product/Goat-anti-Mouse-IgG-H-L-Secondary-Antibody-Polyclonal/A-11031</a>                                                                                                               |
| antiRabbit secondary antibody | Thermo (A-11034)                  | IF (1:1000)                            | <a href="https://www.thermofisher.com/antibody/product/Goat-anti-Rabbit-IgG-H-L-Secondary-Antibody-Polyclonal/A-11034">https://www.thermofisher.com/antibody/product/Goat-anti-Rabbit-IgG-H-L-Secondary-Antibody-Polyclonal/A-11034</a>                                                                                                             |

**Supplementary Table S5. List of primer sequences used for qRT-PCR analyses.**

| <b>Gene name</b> | <b>Primer name and sequences</b>                             |
|------------------|--------------------------------------------------------------|
| GAPDH            | F833: ACCTGACCTGCCGTCTAGAA<br>R1060: TCCACCACCCTGTTGCTGTA    |
| B-Myb            | F484: AAGATGTTGCCAGGGAGGAC<br>R679: TGGTCAGAAGACTTCCCTGG     |
| ZNF473           | F337: TGGACTTCACCTTGGGAGAC<br>R535: TCAGTCACATCAGGGCTTGT     |
| ESCO2            | F1370: AGCAGAGTTTTGGGATGGGA<br>R1599: CAGACAGGACACGAAATGCC   |
| KIF11            | F1110: GGAAGTGAAAACATTGGCCG<br>R1299: ATGTTCTTGTACGCCCTCCA   |
| NRP1             | F1501: ACAGGTAGACTTGGGCCTTC<br>R1694: CAACATCTGTGGGGTTGGTG   |
| E2F1             | F291: CCATCAGTACCTGGCCGAGAGC<br>R494: CGCTTCTGCACCTTCAGCACCT |
| E2F2             | F809: ACTCGGTATGACACTTCGCT<br>R1036: TCTGGTGGGGTCTTCAAACA    |
| E2F3             | F409: GAGCTAGGAGAAAGCGGTCA<br>R509: GGAGTTTTTGGACTATCTGGAC   |
| E2F8             | F74: CCACCACAGCAAATATCGTG<br>R283: CTTTGGCCTCAGGTAATCCA      |
| WISP2            | F1025: GTCGCAGTCCACAAAACAGT<br>R1184: GGTGGACCCAAGCTAAAGTG   |
| DLC1             | F606: AACTCCGTCATCAGCGTTTG<br>R766: TCCATCCGTTTCAGCAGACT     |
| KBTBD6           | F988: GGAGAGTGAGCAGACAGTGT<br>R1140: TTGGTCAGCAGCCCTTCTAA    |
| IGFBP3           | F613: TCTGATCCCAAGTTCCACCC<br>R785: TCCATTTCTCTACGGCAGGG     |



## Supplementary Table S6. Sequences of primers and siRNAs.

### Primers for luciferase reporter constructions

| Constructs     | Methods           | Primers and/or Enzymes used                                                                                                                             |
|----------------|-------------------|---------------------------------------------------------------------------------------------------------------------------------------------------------|
| E2F2-P1314     | PCR based cloning | F1017: CTATCGATAGGTACCGAGCTCTGAAGGTTTTTGAATGAGGCAG <i>Sac I</i><br>R2329: GCTTACTTAGATCGCAGATCTAGCCGCCAATGGACGCCTG <i>Bgl II</i>                        |
| 3×E2F reporter | PCR based cloning | PGL4.27-F-E2F: <u>TTTCGCGCTTAA</u> TTTCGCGCTTAATTTTCGCGCTTAAAGATCTGGCC<br>TCGGCGGCCAAG consensus E2F binding site<br>PGL4.27 -R: GCTAGCGAGCTCAGGTACCGGC |
| B-Myb-P1064    | PCR based cloning | B-Myb-F1085:CGGGGTACCAGTCTAGGCAACAGCAACATAGCA <i>KpnI</i><br>B-Myb-R2148:CCGCTCGAGAGGCGTCAGCGTGTGAGCAGGT <i>XhoI</i>                                    |

### Primers for mutant constructions

| Name                           | Sequences                                                                                                                 |
|--------------------------------|---------------------------------------------------------------------------------------------------------------------------|
| E2F2-P1314-MBS(1/2)m           | Sense: 5'-GCCAGTGAAAAACAAGGGCTCCAGAGCTGGGACC-3'<br>Antisense: 5'-AGGGGTCTTCTACTCTCCCAAGCTGCCTGGG-3'                       |
| E2F2-P1314-EBS(1/2)m           | Sense: 5'-AACTAAAAAAAAAAAAAAAAAGAAGAAAAAAAAAGAGGC-3'<br>Antisense: 5'-CCAAACGTCGTGCCGCGAAATTCGGATCTCCCGCG-3'              |
| E2F2-P1314-EBS(1/2)m+MBS(1/2)m | Sense: 5'-AACTAAAAAAAAAAAAAAAAAGAAGAAAAAAAAAGAGGC-3'<br>Antisense: 5'-CCAAACGTCGTGCCGCGAAATTCGGATCTCCCGCG-3'              |
| mutant 3x E2F reporter         | Sense: 5'-TTTCGATCTTAAATTTGATCTTAAATTTGATCTTAAAGATCTGGCCTCGGCGGC<br>CAAG-3'<br>Antisense: 5'-GCTAGCGAGCTCAGGTACCGGC TT-3' |
| B-Myb-P1064-MBS(1/2)m          | Sense: 5'-CCTGCGAGCGAGGAGCGCGGGACCTGCTGA-3'<br>Antisense: 5'-CCAGTCAGTCGCCGCCGCGGGTTGAAG-3'                               |
| B-Myb-P1064-EBSm               | Sense: 5'-TATGGAGATAGAAAAGTGCTTCAACCCGCGCCGGCGGCGA-3'<br>Antisense: 5'-CAAGCGCGTCGGCGCCGCCAGTCCT-3'                       |
| B-Myb-P1064-EBSm+MBS(1/2)m     | Sense: 5'-TATGGAGATAGAAAAGTGCTTCAACCCGCGCCGGCGGCGA-3'<br>Antisense: 5'-CAAGCGCGTCGGCGCCGCCAGTCCT-3'                       |

### Primers for truncated constructions

| Name                          | Sequences                                                                                           |
|-------------------------------|-----------------------------------------------------------------------------------------------------|
| pCDH-puro-HA-E2F2             | Sense: 5'-TACCCAGACGTCCCAGACTACGCTCTGCAAGGGCCCCGGGCCT-3'<br>Antisense: 5'-CATGGTGGCAGATCCGAGCTCG-3' |
| pCDH-puro-HA-E2F2 $\Delta$ MB | Sense: 5'-GTTGGCCTTGTCTCAGTCAGGTG-3'<br>Antisense: 5'-CTCCCCTCTACCTCCACCCTCTG-3'                    |
| pCDH-puro-HA-E2F2(1-244)      | Sense: 5'-GTTGGCCTTGTCTCAGTCAGGTG-3'<br>Antisense: 5'-TGAGATCCACTAGTAACGGCCGCC-3'                   |
| pCDH-puro-HA-E2F2(245-437)    | Sense: 5'-CATGGTGGCAGATCCGAGCTCG-3'<br>Antisense: 5'-AAGAGGCTGGCCTATGTGACTTACCAG-3'                 |

### siRNA sequences.

| Name                   | Sequences                                                                     |
|------------------------|-------------------------------------------------------------------------------|
| Negative control siRNA | Sense: 5'-UUCUCCGAACGUGUCACGUTT-3'<br>Antisense: 5'-ACGUGACACGUUCGGAGAATT-3'  |
| B-Myb siRNA            | Sense: 5'-CAGACAAUGCUGUGAAGAATT-3'<br>Antisense: 5'-UUCUUCACAGCAUUGUCUGTT-3'  |
| E2F2 siRNA             | Sense: 5'-GACUCGGUAUGACACUUCGTT-3'<br>Antisense: 5'-CGAAGUGUCAUACCGAGUC TT-3' |
