# Supplementary material for: B-Myb accelerates colorectal cancer progression through reciprocal feed-forward transactivation of E2F2
Source: PubMed Central journal article supplement (PMC8445821; doi:10.1038/s41388-021-01961-9), 2021-07-27

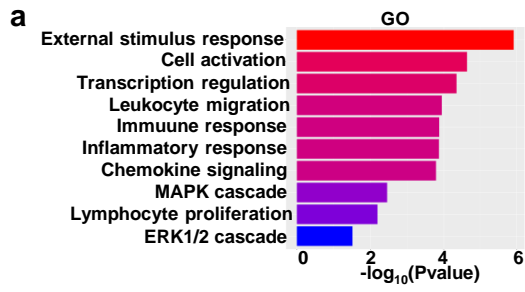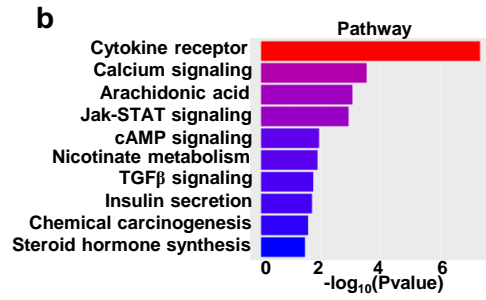

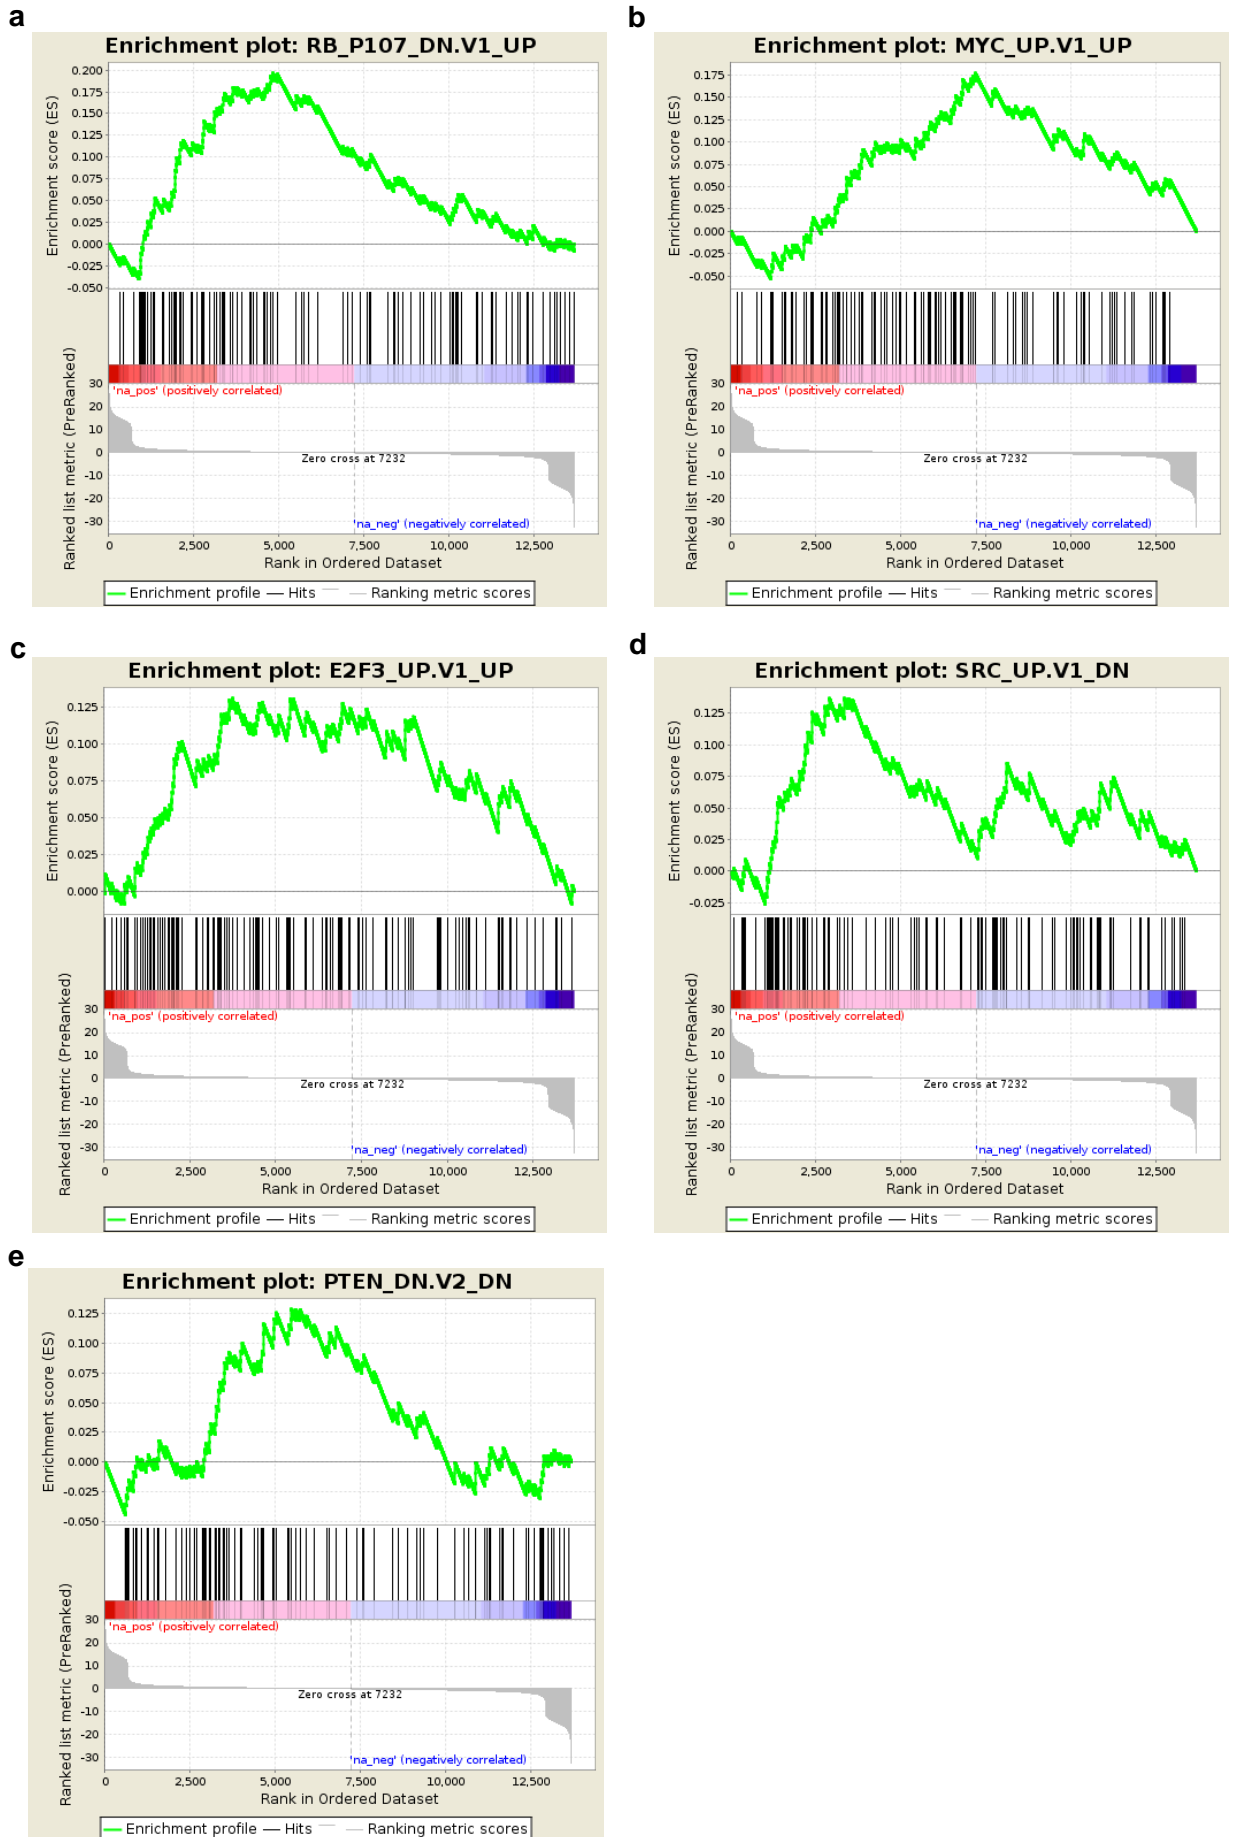

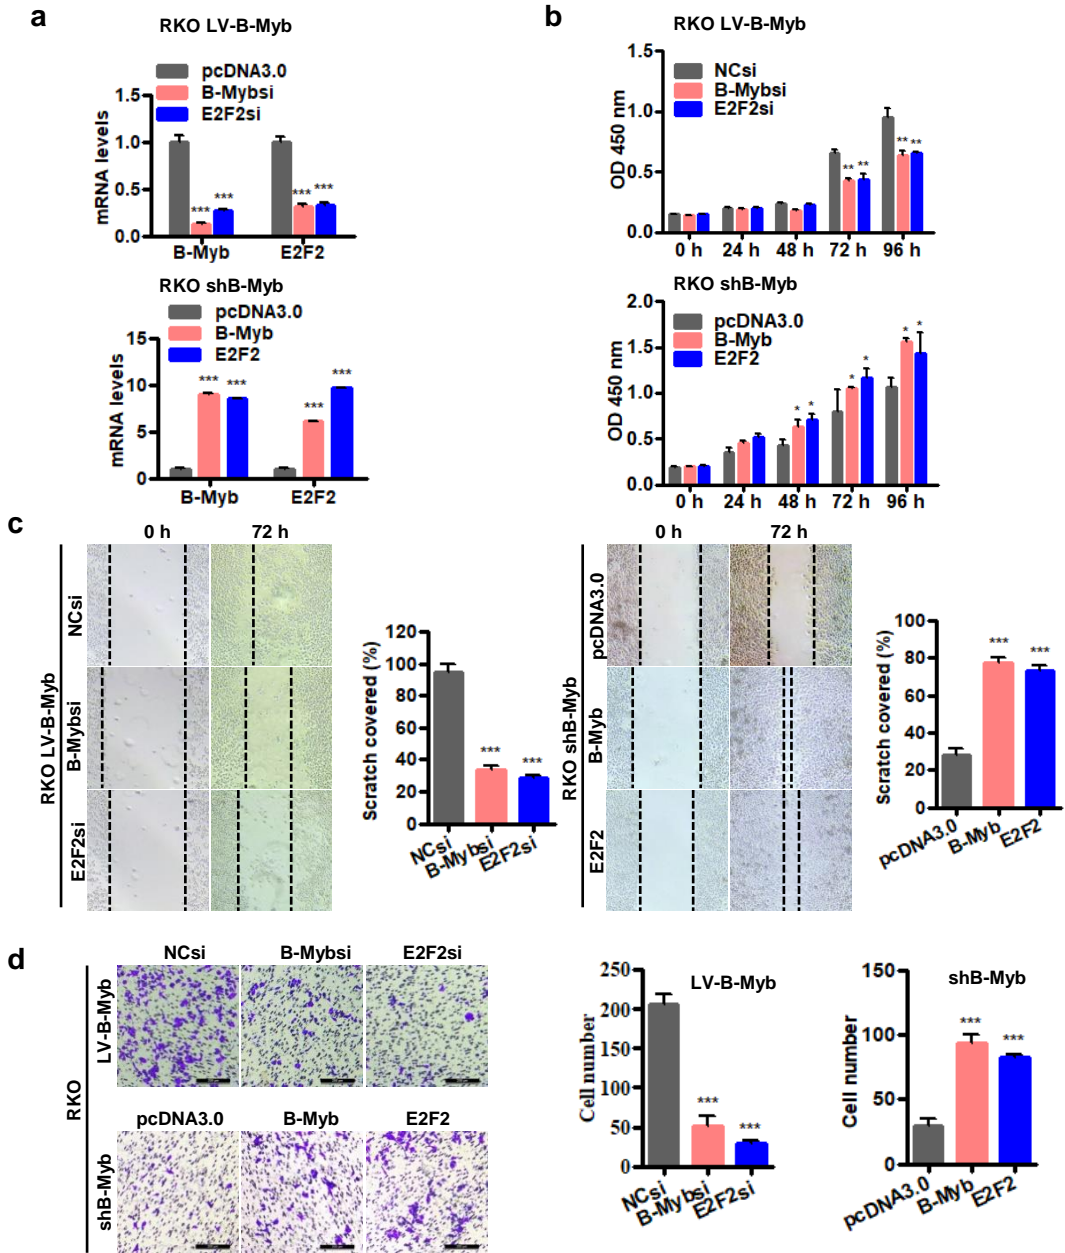

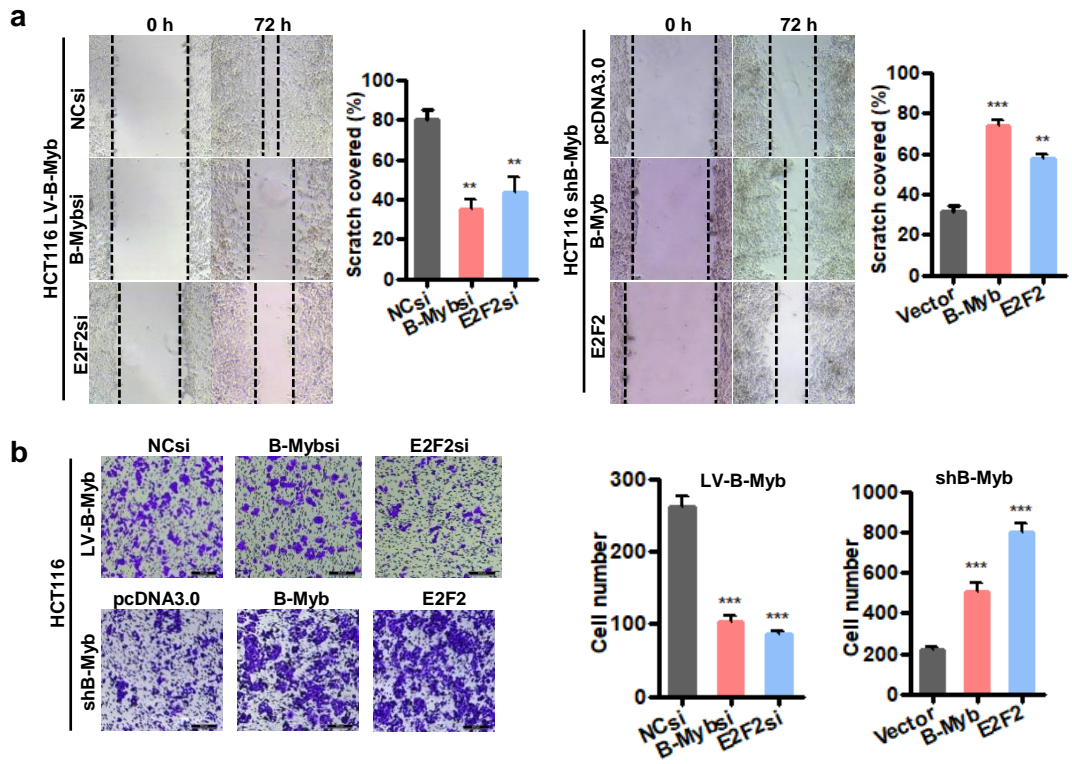

Supplement: 41388_2021_1961_MOESM4_ESM.pdf [file 41388_2021_1961_MOESM4_ESM.pdf]
